# Supplementary material for: Checklist of the Fishes of the Kundelungu National Park (Upper Congo Basin, DR Congo): Species Diversity and Endemicity of a Poorly Known Ichthyofauna
Source: MDPI journal article supplement (doi:10.3390/d15020259), 2023-02-12
Supplement: s1 [file s1]

Archive with 1 entries (1 files):
- diversity-2019315-supplementary.pdf
